# Supplementary material for: Tumor-associated macrophages promote neuroblastoma via STAT3 phosphorylation and up-regulation of c-MYC
Source: PubMed Central journal article supplement (PMC5710942; doi:10.18632/oncotarget.21066), 2017-09-16
Supplement: oncotarget-08-91516-s001.pdf [file oncotarget-08-91516-s001.pdf]

## Tumor-associated macrophages promote neuroblastoma via STAT3 phosphorylation and up-regulation of c-MYC

### SUPPLEMENTARY MATERIALS

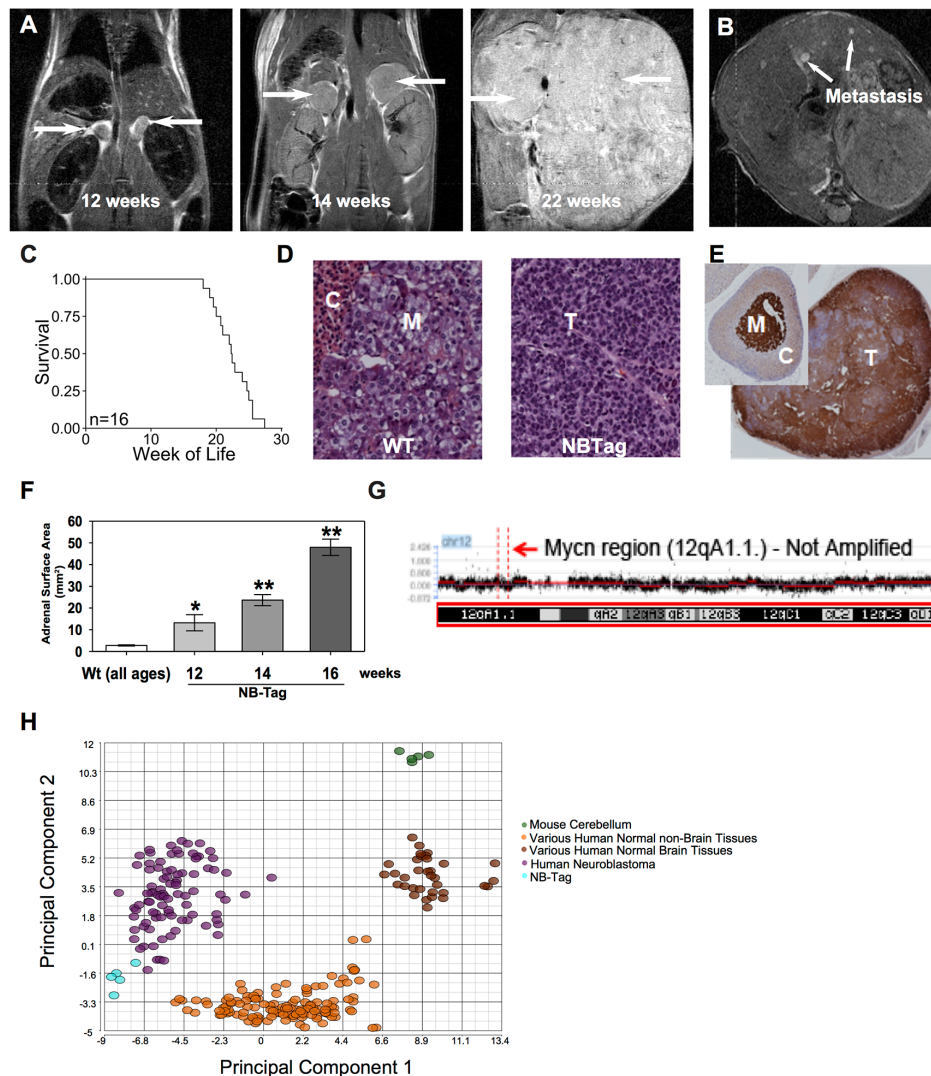

**Supplementary Figure 1: NB-Tag represents an immunocompetent spontaneous murine model of human high-risk MYCN non-amplified neuroblastomas.** (A) Representative MRI images of tumor growth in the bilateral adrenal glands (white arrows) of NB-Tag mice at different ages; (B) MRI image of liver metastasis in NB-Tag mice, typically evident around 22 weeks of age; (C) Survival analysis of NB-Tag mice (n=16) shows 100% penetrance and lethality of the disease; (D) H&E analysis of formalin-fixed, paraffin-embedded sections of normal adrenal gland (left photomicrograph; C, Cortex; M, Medulla) and of tumor (right photomicrograph; T, tumor) showing undifferentiated small blue round tumor cells with high mitosis-karyorrhexis index; (E) Immunohistochemical (IHC) staining for tyrosine hydroxylase (TH) of 12-week-old NB-Tag tumor compared to normal adrenal gland (magnification  $\times 200$ ); (F) Mean (+SD) surface area of adrenal glands in WT mice (n = 7) and NB-Tag tumors at 12, 14, and 16 weeks (n = 5-6 mice per group) as assessed from MRI images (\* p < 0.05; \*\* p < 0.005); (G) Comparative Genomic Hybridization plot of the chromosome 12 region, which harbors the mouse *MYCN* gene (red dashed lines), for a NB-Tag tumor. The Y-axis indicates the log<sub>2</sub> ratio for each probe set (log<sub>2</sub> ratio of 0 indicates normal copy number), a positive log<sub>2</sub> ratio indicates amplification, while a negative log<sub>2</sub> ratio indicates deletion; (H) Scatter plot of the first two principal components of z-score normalized gene expression data from microarray studies of NB-Tag tumors (cyanide; n=5 unique tumors), mouse normal cerebellum (green; n=5 unique cerebella), human primary neuroblastoma tumors (purple; GSE3446), and various normal human brain (brown) and non-brain (orange) tissues (GSE1133).

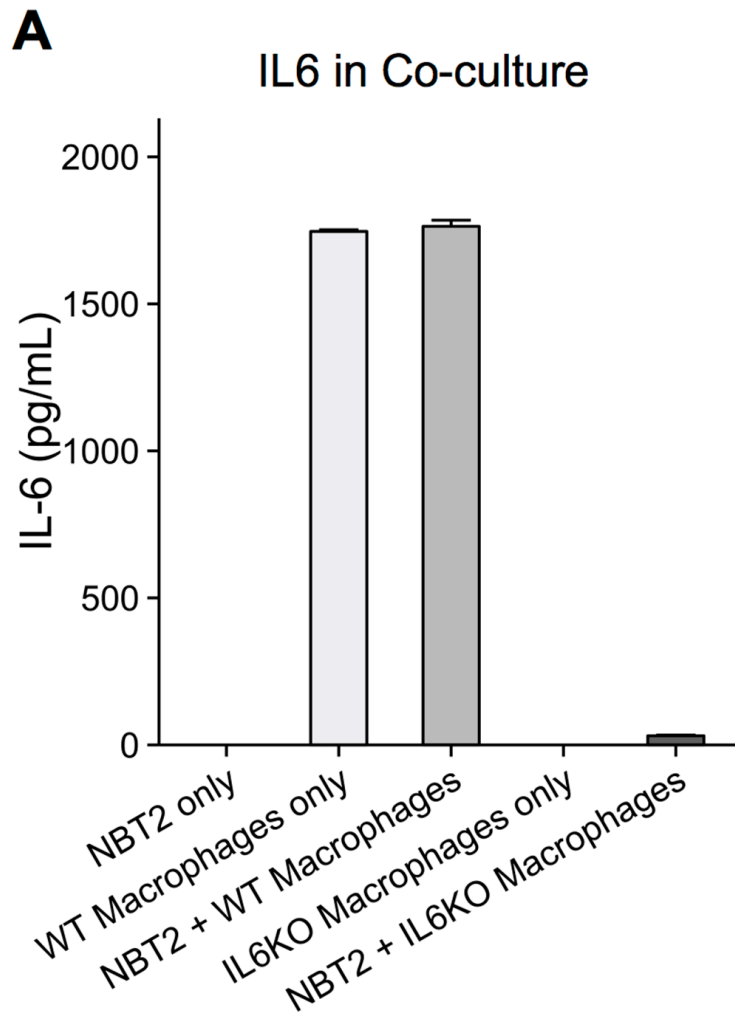

**Supplementary Figure 2: (A)** Mean (+SD) IL-6 concentration in media from cultures of NBT2 cells, cultures macrophages from *IL6* WT and KO animals, and their co-cultures. (n = 3 independent experiments per group), as assessed by Luminex.

**Supplementary Table 1: List of genes from the TARGET microarray data (n=249 samples) that have correlation (spearman correlation) value greater than 0.75 with CD163 expression**

See Supplementary File 1
